# Supplementary material for: Associations between symptoms of sleep-disordered breathing and maternal sleep patterns with late stillbirth: Findings from an individual participant data meta-analysis
Source: PLOS journal article supplement (doi:10.1371/journal.pone.0230861), 2020-03-26
Supplement: S4 (10.1371/journal.pone.0230861.s004) [file journal.pone.0230861.s004]

# BMJ Open

## The Collaborative IPD of Sleep and Stillbirth (Cribss) - an Individual Participant Data Meta-Analysis study protocol

|                                 |                                                                                                                                                                                                                                                                                                                                                                                                                                                                                                                                                                                                                                                                                                                                                                                                                                                                                                                                                 |
|---------------------------------|-------------------------------------------------------------------------------------------------------------------------------------------------------------------------------------------------------------------------------------------------------------------------------------------------------------------------------------------------------------------------------------------------------------------------------------------------------------------------------------------------------------------------------------------------------------------------------------------------------------------------------------------------------------------------------------------------------------------------------------------------------------------------------------------------------------------------------------------------------------------------------------------------------------------------------------------------|
| Journal:                        | <i>BMJ Open</i>                                                                                                                                                                                                                                                                                                                                                                                                                                                                                                                                                                                                                                                                                                                                                                                                                                                                                                                                 |
| Manuscript ID                   | bmjopen-2017-020323                                                                                                                                                                                                                                                                                                                                                                                                                                                                                                                                                                                                                                                                                                                                                                                                                                                                                                                             |
| Article Type:                   | Protocol                                                                                                                                                                                                                                                                                                                                                                                                                                                                                                                                                                                                                                                                                                                                                                                                                                                                                                                                        |
| Date Submitted by the Author:   | 28-Oct-2017                                                                                                                                                                                                                                                                                                                                                                                                                                                                                                                                                                                                                                                                                                                                                                                                                                                                                                                                     |
| Complete List of Authors:       | <p>Li, Minglan; University of Auckland, Department of Obstetrics and Gynaecology</p> <p>Thomprun, John; University of Auckland, Paediatrics: Child and Youth Health</p> <p>Cronin, Robin; University of Auckland, Department of Obstetrics and Gynaecology</p> <p>Gordon, Adrienne; University of Sydney - Camden Campus, Department of Paediatrics</p> <p>Raynes-Greenow, Camille; The University of Sydney, School of Public Health</p> <p>Heazell, Alexander; University of Manchester, Maternal and Fetal Health Research Centre</p> <p>Stacey, Tomasina; University of Leeds, School of Healthcare</p> <p>Culling, Vicki ; Vicki Culling Associates</p> <p>Bowring, Victoria; Stillbirth Foundation Australia</p> <p>Mitchell, Edwin; University of Auckland, Paediatrics</p> <p>McCowan, Lesley; University of Auckland</p> <p>Askie, Lisa; University of Sydney, National Health and Medical Research Council Clinical Trials Centre</p> |
| <b>Primary Subject Heading</b>: | Obstetrics and gynaecology                                                                                                                                                                                                                                                                                                                                                                                                                                                                                                                                                                                                                                                                                                                                                                                                                                                                                                                      |
| Secondary Subject Heading:      | Epidemiology                                                                                                                                                                                                                                                                                                                                                                                                                                                                                                                                                                                                                                                                                                                                                                                                                                                                                                                                    |
| Keywords:                       | Stillbirth, Sleep position, Individual participant data meta-analysis, Small for gestational age, Fetal movement                                                                                                                                                                                                                                                                                                                                                                                                                                                                                                                                                                                                                                                                                                                                                                                                                                |
|                                 |                                                                                                                                                                                                                                                                                                                                                                                                                                                                                                                                                                                                                                                                                                                                                                                                                                                                                                                                                 |

SCHOLARONE™  
Manuscripts

|                                      |                                                                        |
|--------------------------------------|------------------------------------------------------------------------|
| Minglan Li <sup>1</sup>              | m.li@auckland.ac.nz                                                    |
| John MD Thompson <sup>1,2</sup>      | j.thompson@auckland.ac.nz                                              |
| Robin S Cronin <sup>1</sup>          | r.cronin@auckland.ac.nz                                                |
| Adrienne Gordon <sup>3,4</sup>       | adrienne.gordon@sydney.edu.au                                          |
| Camille Raynes-Greenow <sup>5</sup>  | camille.raynes-greenow@sydney.edu.au                                   |
| Alexander E P Heazell <sup>6,7</sup> | alexander.heazell@manchester.ac.uk                                     |
| Tomasina Stacey <sup>8</sup>         | t.stacey@leeds.ac.uk                                                   |
| Vicki Culling <sup>9</sup>           | vicki@vca.co.nz                                                        |
| Victoria Bowring <sup>10</sup>       | victoria@stillbirthfoundation.org.au                                   |
| Edwin A Mitchell <sup>2</sup>        | e.mitchell@auckland.ac.nz                                              |
| Lesley ME McCowan <sup>1</sup>       | <a href="mailto:l.mccowan@auckland.ac.nz">l.mccowan@auckland.ac.nz</a> |
| Lisa Askie <sup>11</sup>             | lisa.askie@ctc.usyd.edu.au                                             |

1. Department of Obstetrics and Gynaecology, University of Auckland, Auckland, New Zealand. 2. Department of Paediatrics and Child Health, University of Auckland, Auckland, New Zealand. 3. Department of Newborn Care, Royal Prince Alfred Hospital Women and Babies, Sydney, Australia. 4. The University of Sydney, Charles Perkins Centre, University of Sydney, Sydney, NSW, Australia. 5. The University of Sydney, Sydney School of Public Health, Sydney, NSW, Australia. 6. Maternal and Fetal Health Research Centre, Division of Developmental Biomedicine, Faculty of Medical and Human Sciences, University of Manchester, UK. 7. St. Mary's Hospital, Central Manchester University Hospitals NHS Foundation Trust, Manchester Academic Health Science Centre, Manchester, UK. 8. School of Healthcare, University of Leeds, Leeds, UK. 9. Vicki Culling Associates, Auckland, New Zealand.

28 Zealand. 10. Stillbirth Foundation, Australia. 11. National Health and Medical Research  
29 Council Clinical Trials Centre, University of Sydney, Camperdown, Australia.

30

31 Co-responding author:

32 Minglan Li

33 Department of Obstetrics and Gynaecology,

34 University of Auckland,

35 Private Bag 92019

36 Auckland, New Zealand

37

1  
2  
3  
4  
5  
6  
7  
8  
9  
10  
11  
12  
13  
14  
15  
16  
17  
18  
19  
20  
21  
22  
23  
24  
25  
26  
27  
28  
29  
30  
31  
32  
33  
34  
35  
36  
37  
38  
39  
40  
41  
42  
43  
44  
45  
46  
47  
48  
49  
50  
51  
52  
53  
54  
55  
56  
57  
58  
59  
60

38 **ABSTRACT**

39 **Introduction:** Accumulating evidence has shown an association between maternal supine  
40 going-to-sleep position and stillbirth in late pregnancy. Advising women not to go to sleep on  
41 their back can potentially reduce late stillbirth rate by 9%. However, the association between  
42 maternal right-sided going-to-sleep position and stillbirth is inconsistent across studies.  
43 Furthermore, individual studies are underpowered to investigate interactions between  
44 maternal going-to-sleep position and fetal vulnerability, which is potentially important for  
45 producing clear and tailored public health messages on safe going-to-sleep position. We will  
46 use individual participant data (IPD) from existing studies to assess whether right-side and  
47 supine going-to-sleep positions are independent risk factors for late stillbirth and test the  
48 interaction between going-to-sleep position and fetal vulnerability.

49 **Methods and Analysis:** An IPD meta-analysis approach will be utilised using the Cochrane  
50 Collaboration-endorsed methodology. We will identify case-control and prospective cohort  
51 studies and randomised trials which collected maternal going-to-sleep position data and  
52 pregnancy outcome data that included stillbirth. The primary outcome is stillbirth. A one  
53 stage procedure meta-analysis, stratified by study with adjustment of a priori confounders  
54 will be carried out.

55 **Ethics and dissemination:** The IPD meta-analysis has obtained central ethics approval  
56 from the New Zealand Health and Disability Ethics Committee, ref: NTX/06/05/054/AM06.  
57 Individual studies should also have ethical approval from relevant local ethics committees.  
58 Interpretation of the results will be discussed with consumer representatives. Results of the  
59 study will be published in peer-reviewed journals and presented at international conferences.

60 **Systematic review registration:** PROSPERO registration number: CRD42017047703

62 **STRENGTHS AND LIMITATIONS OF THIS STUDY**

- 63 • Late stillbirth is a rare event in high-income countries, and individual participant data  
64 meta-analysis of several studies can yield a sufficiently large sample size for exploring  
65 interactions and subgroup analysis that are difficult to undertake within a single study.

- 66 • There is no restriction on language or countries where the study was conducted,  
67 therefore the results from this study are likely to be generalisable.
- 68 • It is the first IPD meta-analysis examining the association between maternal going-to-  
69 sleep position in late pregnancy and the risk of stillbirth, and the potential interactions  
70 with other stillbirth risk factors. The results from this study are likely to contribute  
71 important messages for a public health intervention.
- 72 • Service users will oversee the conduct of the study. Their involvement will help to design  
73 appropriate research questions and will help the implementation and translation of the  
74 research outcomes.
- 75 • One limitation of the study is that the maternal going-to-sleep positions are likely to be  
76 self-reported.

1  
2  
3  
4  
5  
6  
7  
8  
9  
10  
11  
12  
13  
14  
15  
16  
17  
18  
19  
20  
21  
22  
23  
24  
25  
26  
27  
28  
29  
30  
31  
32  
33  
34  
35  
36  
37  
38  
39  
40  
41  
42  
43  
44  
45  
46  
47  
48  
49  
50  
51  
52  
53  
54  
55  
56  
57  
58  
59  
60

79     **INTRODUCTION**

80     Stillbirth, the death of a baby before birth, is a major global burden affecting more than 2.6  
81     million families per year [1]. In high-income countries, the rate of late stillbirth (28 weeks or  
82     greater) varies widely from 1.3 to 8.8 per 1,000 births [2] and is approximately twice as  
83     common as neonatal death [3]. Importantly, the annual rate of reduction for neonatal death is  
84     twice that of stillbirth [2]. The variations between countries suggest it is possible to further  
85     reduce late stillbirth. Importantly, maternal characteristics present in early pregnancy only  
86     explain a small amount of the risk for late stillbirth [4]. Therefore, significant reductions in late  
87     stillbirth require identification of additional maternal risk factors amenable to modification  
88     during pregnancy [5].

89  
90     Accumulating evidence suggests that supine going-to-sleep position may be a modifiable  
91     risk factor for stillbirth in late pregnancy. Stacey *et al.* first reported an association between  
92     going-to-sleep position and late stillbirth, with women who did not go-to-sleep on their left  
93     side, the night before the baby was suspected to have died, having an increased odds of  
94     stillbirth [6]. Among non-left sided sleepers, the odds were greater in women who went to  
95     sleep supine; and there was also a borderline increase in odds in women who went to sleep  
96     on their right side [6]. Similar associations between supine going-to-sleep position and late  
97     stillbirth have since been reported by several studies [7-9]. In addition to the epidemiologic  
98     evidence, a number of physiological studies have suggested that the relationship between  
99     supine going-to-sleep position and late stillbirth is biologically plausible. Significant  
100     hemodynamic changes in maternal and fetal circulation have been observed in relation to  
101     maternal position in late pregnancy, with decreased maternal cardiac output and uterine  
102     blood flow [10], and pulsatility index in the fetal middle cerebral artery (a surrogate for fetal  
103     hypoxia) [11] seen in maternal supine position when compared to left position. A recent  
104     study by Stone *et al.* has shown that when the mother is in the supine position, the fetus  
105     spends more time in behavioural state 1 (fetal quiescence) and less time in active fetal  
106     behavioural state 4, compared to when the mother is on her left side, indicating supine

position may be a mild hypoxic stressor [12]. It was hypothesised that these physiological changes associated with supine position are related to the direct compression of the inferior vena cava by the gravid uterus [13]. Furthermore, supine sleep position is also associated with sleep disturbed breathing and obstructive sleep apnoea [14], which have also been associated with pregnancy complications such as pre-eclampsia, fetal growth restriction [15], and gestational diabetes [15, 16]. These pregnancy complications are known risk factors for stillbirth [17], and might represent another mechanism that contributes to the association between supine going-to-sleep position and late stillbirth.

The findings from the epidemiological studies combined with the supportive physiological evidence suggest that the association between supine sleep position and late stillbirth is likely to be causal. Informing pregnant women and their healthcare providers about optimal going-to-sleep position in late pregnancy is a strategy that may reduce stillbirth and is potentially harmless. Therefore, there is an urgent need to assess the accumulated evidence to develop a public health campaign. However, there are some unanswered questions that are critical for developing clear public health messages. Firstly, it is unclear whether right sided going-to-sleep position is a risk factor for late stillbirth. A borderline increase in risk was reported with right side compared to left side going-to-sleep position in the Stacey *et al.* study. However, this association was not found in other studies [7, 9]. The inconsistent finding of right side going-to-sleep position warrants further clarification so that clear advice about whether women should be advised to go-to-sleep on either side or only on their left side can be developed. Secondly, there is no evidence whether there are groups of women who are at elevated risk when they go-to-sleep in a suboptimal position (such as those who smoke, are overweight or have small babies etc.) and how other stillbirth risk factors interact with sleep position. Stillbirth is the end point of diverse pathological processes. Multiple risk factors and pathological events can contribute at different time points and cumulatively lead to the final event. Our research group has hypothesised a triple-risk framework for late stillbirth that cannot be explained by one risk factor or condition alone [18]. We speculate

1  
2  
3  
4  
5  
6  
7  
8  
9  
10  
11  
12  
13  
14  
15  
16  
17  
18  
19  
20  
21  
22  
23  
24  
25  
26  
27  
28  
29  
30  
31  
32  
33  
34  
35  
36  
37  
38  
39  
40  
41  
42  
43  
44  
45  
46  
47  
48  
49  
50  
51  
52  
53  
54  
55  
56  
57  
58  
59  
60

135 that three groups of factors namely maternal factors (eg, obesity, smoking), fetal and  
136 placental factors (eg, a small for gestational age (SGA) fetus ) and an additional stressor(s)  
137 (eg, reduced uterine blood flow associated with supine position) in themselves may be  
138 insufficient to cause the death, but their combination may have a lethal effect [18]. Individual  
139 stillbirth case control studies published to date have insufficient power to explore fully the  
140 interactions between supine going-to-sleep position, markers of fetal vulnerability and  
141 adverse maternal factors. Furthermore, it is important to explore other factors that may also  
142 be associated with supine sleep position such as SGA, reduced fetal movements and sleep  
143 disturbed breathing, as this may provide insights into the potential mechanism of risk  
144 associated with the supine position.

145  
146 The Collaborative IPD Sleep and Stillbirth (Cribss) group was established in December 2016.  
147 We aim to synthesise the current evidence about going-to-sleep position and stillbirth risk.  
148 Additionally we will address the above unanswered questions by combining and analysing  
149 the individual participant data from all available studies in an individual participant data (IPD)  
150 meta-analysis. IPD meta-analysis is considered the gold standard approach to evidence  
151 synthesis as it has the potential to improve the precision and reliability of the results obtained  
152 from individual studies [19]. In contrast to the traditional approach of meta-analysis, which  
153 extracts summary (aggregate) data from study publications, an IPD meta-analysis uses line-  
154 by-line original data sourced directly from the researchers responsible for the relevant  
155 studies. An IPD meta-analysis involves the central collection, checking, harmonisation and  
156 re-analysis of the original data of all eligible participants from each of the available studies.  
157 With proper quality assessment and standardisation processes, an IPD meta-analysis can  
158 model complex relationships, which traditional meta-analyses are not able to do [20]. It is  
159 particularly useful in evaluating multi-factorial frameworks by evaluating critical outcome  
160 determinants and their interactions.

161  
162



## OBJECTIVES

The main questions to be addressed by the Cribss IPD meta-analysis are:

1. Is maternal going-to-sleep position associated with late stillbirth?
2. Are indicators of fetal vulnerability, including: maternal obesity, SGA, maternal smoking, maternal second-hand tobacco exposure, substance use, alcohol consumption, maternal medical conditions (including pre-existing hypertension and diabetes), and maternal perception of fetal movements associated with late stillbirth?
3. Does maternal going-to-sleep position interact with indicators of fetal vulnerability to influence the risk of late stillbirth?

Secondary questions to be addressed by the first cycle of Cribss IPD meta-analysis are:

1. Is sleep disturbed breathing associated with late stillbirth? Is (are) going-to-sleep position(s) associated with greater risk of late stillbirth in women with sleep disturbed breathing?
2. Are factors that may influence vena caval compression (eg, long sleep duration, sleeping during the day, restless legs,) associated with risk of late stillbirth? Do these factors interact with going-to-sleep position?
3. Do women who report they received advice about sleep position have lower risk of late stillbirth compared with women who did not receive such advice?
4. Do women who report they received advice about awareness of fetal movements have a lower risk of late stillbirth than women who did not receive such advice?

## METHODS AND ANALYSIS

This study will apply an IPD meta-analysis approach, and will follow the methodology endorsed by the Cochrane Collaboration where applicable [21, 22]. We will adhere to the Preferred Reporting Items for Systematic Reviews and Meta-analysis (PRISMA) IPD statement for reporting findings. The study will be conducted by the Collaborative IPD Sleep and Stillbirth (Cribss) group which comprises the participating study investigators, an IPD expert, and consumer representatives. The coordination centre is located in the department

1  
2  
3  
4  
5  
6  
7  
8  
9  
10  
11  
12  
13  
14  
15  
16  
17  
18  
19  
20  
21  
22  
23  
24  
25  
26  
27  
28  
29  
30  
31  
32  
33  
34  
35  
36  
37  
38  
39  
40  
41  
42  
43  
44  
45  
46  
47  
48  
49  
50  
51  
52  
53  
54  
55  
56  
57  
58  
59  
60

191 of Obstetrics and Gynaecology at the University of Auckland, Auckland, New Zealand. We  
192 have registered the IPD Study with the PROSPERO international prospective register of  
193 systematic reviews (CRD42017047703).

194  
195 **Eligibility criteria**

196 Study inclusion criteria (regardless of whether the study is published or unpublished):

- 197 1. Case-control and prospective cohort studies which collected:
- 198 • Maternal going-to-sleep position during pregnancy and
  - 199 • Pregnancy outcome that included stillbirth and
  - 200 • Aimed to recruit controls with an on-going pregnancy at similar gestation to the cases
- 201 2. Randomised controlled trials which collected:
- 202 • Maternal going-to-sleep position during pregnancy and
  - 203 • Pregnancy outcome data that included stillbirth and
  - 204 • Did not test an intervention that might have an impact on going-to-sleep position

205 Participant level exclusion criteria:

- 206 • Multiple pregnancy in the third trimester
- 207 • Major congenital abnormality at study entry or major congenital abnormality as a  
208 cause of death found post study entry or post-randomisation in randomised  
209 controlled trials
- 210 • Gestation less than 28 weeks when last sleep position data during pregnancy was  
211 collected
- 212 • Termination of pregnancy at greater than or equal to 28 weeks

213  
214 **Information sources and search strategy**

215 We will develop the search strategy according to the Cochrane Collaboration guidelines prior  
216 to the initial literature search. A search of the databases: MEDLINE, EMBASE, LILACS, Web  
217 of Science, OpenGrey, and Google Scholar, will be conducted, for the purpose of locating

published research about an association between maternal sleep position and late pregnancy stillbirth. We will also access the WHO International Clinical Trials Registry Platform to identify any ongoing and registered trials. Proceedings from International Stillbirth Alliance (ISA) annual conferences and The International Society for the Study and Prevention of Perinatal and Infant Death (ISPID) international conferences. Published perinatal conference abstracts will also be identified through the above database searches. Experts in the field and the collaborative group will be asked about their knowledge of any unpublished studies. To increase the likelihood of identifying all relevant studies, the reference lists of all retrieved articles will be hand searched. No language restriction will be applied.

Four search terms will be used to search the databases with the article title, abstracts and body all searched. The search terms are: 'stillbirth', 'fetal death', 'perinatal death' and 'sleep' and synonyms. The search terms will be tested to check that they effectively located the types of articles that are consistent with the inclusion criteria prior to conducting the search in all engines. An example of a detailed MEDLINE search strategy is presented in supplementary appendix 1.

### **Selection process**

Study eligibility will be assessed independently by two members of the Cribss group, any disagreements will be adjudicated by a third member. Eligibility assessment will be based on published protocols, method sections from publications, and unpublished protocols and, or study information requested from potential eligible study investigators. All potential eligible study investigators will be contacted to verify eligibility. Participant level exclusion criteria will be applied during the analysis. The main investigator and/or the corresponding author from any eligible study will be approached via email to participate in the Cribss IPD meta-analysis study. If there is no reply, other co-authors of the published manuscript will be subsequently approached.

1  
2  
3  
4  
5  
6  
7  
8  
9  
10  
11  
12  
13  
14  
15  
16  
17  
18  
19  
20  
21  
22  
23  
24  
25  
26  
27  
28  
29  
30  
31  
32  
33  
34  
35  
36  
37  
38  
39  
40  
41  
42  
43  
44  
45  
46  
47  
48  
49  
50  
51  
52  
53  
54  
55  
56  
57  
58  
59  
60

246  
  
247  
  
248  
  
249  
  
250  
  
251  
  
252  
  
253  
  
254  
  
255  
  
256  
  
257  
  
258  
  
259  
  
260  
  
261  
  
262  
  
263  
  
264  
  
265  
  
266  
  
267  
  
268  
  
269  
  
270  
  
271  
  
272  
  
273

**Data acquisition and data management**

The data centre is located in the Department of Obstetrics and Gynaecology at the University of Auckland, New Zealand, who will manage transferring and sharing of data. A detailed data management plan has been reviewed and agreed by all Cribss members.

Each eligible study lead investigator will be asked to provide de-identified individual level participant data for each participant enrolled in their study. Some indirect potential identifiers (eg, age, ethnicity) are essential demographic characteristics, and will be required. A study ID for each participant will be retained as this is essential for data integrity checking and data cleaning. Each study investigator will also be asked to provide metadata (such as questionnaires, data collection forms, data dictionaries) and study-level data to explain the variables, and data on the study representativeness (Table 1).

The anonymised data in a common format (eg, cvs., xls. or other formats that can be converted by the Cribss data centre) will be requested for transfer via the University of Auckland institutional Seafile file synchronisation and share platform or equivalent secure means. The Seafile platform has built-in file encryption. Files are encrypted before syncing to the server. User authentication is needed to access the files [23].

The anonymised dataset from each participating study will be checked for data integrity. This will include: 1) checking data range and outliers, 2) clarifying missing data, 3) identifying invalid values, 4) detecting duplicates, and 5) verifying internal consistency where appropriate. Reports of discrepancies will be generated and sent to each participating study investigator for further verification or correction where necessary.

After appropriate data cleaning, the individual participating study investigators will confirm and sign-off on their own dataset before it is merged into the IPD database. New variables

will be generated following a set of consistent harmonisation rules that will be decided by the Cribss group. An IPD data dictionary will be created to document the details of variables (including variable names, type, explanation, and validation rules) to help other users to understand the dataset.

## Data items

We aim to collect the following data items from each participating study (Table 1).

Table 1 Data items will be requested from participating studies

| Study level information                                                                                                                                                                                              |  |
|----------------------------------------------------------------------------------------------------------------------------------------------------------------------------------------------------------------------|--|
| 1. Study inclusion and exclusion criteria                                                                                                                                                                            |  |
| 2. Matching method of cases and controls                                                                                                                                                                             |  |
| 3. Time period of recruitment                                                                                                                                                                                        |  |
| 4. Number of cases and controls                                                                                                                                                                                      |  |
| 5. Informed consent procedure                                                                                                                                                                                        |  |
| 6. Study participant representativeness (eg, minimal demographic data comparison between participant and eligible non-participant, or between participants and a relevant comparison of a maternity care population) |  |
| Participant level information                                                                                                                                                                                        |  |
| A. Maternal characteristics                                                                                                                                                                                          |  |
| 1. Unique study ID                                                                                                                                                                                                   |  |
| 2. Maternal demographic details including: age, ethnicity                                                                                                                                                            |  |
| 3. Past obstetric history                                                                                                                                                                                            |  |
| 4. Maternal height                                                                                                                                                                                                   |  |
| 5. Earliest available maternal weight in the study pregnancy                                                                                                                                                         |  |
| 6. Gestation at earliest available weight                                                                                                                                                                            |  |
| 7. Last available maternal weight in current pregnancy                                                                                                                                                               |  |

|                                                                                                        |
|--------------------------------------------------------------------------------------------------------|
| 8. Gestation at last available weight                                                                  |
| 9. Study centre (if the study was conducted in more than one centre)                                   |
| 10. Highest completed education level at the time of recruitment                                       |
| 11. Marital status at the time of recruitment                                                          |
| 12. Pre-existing medical conditions and medical conditions during the study pregnancy                  |
| 13. Smoking status before and during the study pregnancy                                               |
| 14. Exposure to second-hand smoke before and during the study pregnancy                                |
| 15. Alcohol consumption before and during the study pregnancy                                          |
| 17. Recreational drug usage before and during the study pregnancy                                      |
| <b>B. Maternal sleep practices and fetal movement data in every available time frame</b>               |
| 1. Going-to-sleep position                                                                             |
| 2. Sleep duration                                                                                      |
| 3. Number of times getting up during the night (eg, to go to the toilet)                               |
| 4. Frequency of daytime napping                                                                        |
| 5. Bed size                                                                                            |
| 6. Number of people shared bed with                                                                    |
| 7. Self-reported details of snoring behaviour                                                          |
| 8. Insomnia                                                                                            |
| 9. Sleep quality as measured by validated questionnaire                                                |
| 10. Maternal perception of fetal movement                                                              |
| 11. Advice received on fetal movement                                                                  |
| 12. Advice received on sleep position                                                                  |
| <b>C. Antenatal care and pregnancy outcomes</b>                                                        |
| 1. Gestation (gestation at enrolment for controls, and gestation at diagnosis of stillbirth for cases) |
| 2. Baby sex                                                                                            |
| 3. Baby birthweight                                                                                    |

4. Gestation for calculating birthweight centile
5. Birthweight centile per original study standards
6. Type of facility of baby's birth
7. Gestation at earliest ultrasound
8. Blood pressure and gestation at measurement
9. Type of maternity provider
10. Number of antenatal visits in each trimester
11. Ultrasound scans (first trimester scan, anatomy scan and third trimester growth scan(s))
12. Antenatal vaginal bleeding
13. Hospital admission(s)
14. Use of antibiotics
15. Nutritional supplements
16. Clinical suspicion of fetal growth restriction (FGR) /SGA
17. Management of clinically suspected FGR/SGA
18. Laboratory tests for glucose metabolism (including polycose glucose challenge test, haemoglobin A1c and oral glucose tolerance test), hepatitis B status and blood group and the gestation that the tests were conducted.

#### **D. Stillbirth cases specific data**

1. Time of day mother thought the baby died
2. The reason that the mother thought something was wrong with the pregnancy
3. The reason that the mother saw a health practitioner at the diagnosis of stillbirth
4. Maternal decision on postmortem
5. Placental pathology results
6. The Perinatal Society of Australia and New Zealand (PSANZ) coding for classification of cause of stillbirth

283

284 **Outcome measures**

1  
2  
3  
4  
5  
6  
7  
8  
9  
10  
11  
12  
13  
14  
15  
16  
17  
18  
19  
20  
21  
22  
23  
24  
25  
26  
27  
28  
29  
30  
31  
32  
33  
34  
35  
36  
37  
38  
39  
40  
41  
42  
43  
44  
45  
46  
47  
48  
49  
50  
51  
52  
53  
54  
55  
56  
57  
58  
59  
60

The primary outcome is late stillbirth, using the WHO recommended definition for stillbirth for international comparison: “a baby born with no signs of life at or after 28 weeks' gestation” [24]. Intrapartum stillbirth will be included in the analysis with the rationale that supine going-to-sleep position may result in a vulnerable baby that is unable to tolerate labour.

**Risk of bias assessment**

Risk of bias for non-randomised studies will be assessed in duplicate and independently by two investigators from the Cribss group, using Risk of Bias In Non-randomized Studies – of Exposure (ROBINS-E) assessment tool [25]. The assessment results will be compared. Any disagreement will be resolved by discussion or by a third reviewer.

**Statistical analysis plan**

A detailed statistical analysis plan will be prepared by the Cribss data centre group and reviewed, agreed upon and published by the Cribss group prior to the analysis. All going-to-sleep positions will be compared to left sided going-to-sleep position as the reference group. The last available going-to-sleep position during pregnancy (within two weeks before stillbirth in cases) will be harmonised and used for the primary objectives.

An individual participant data (IPD) analysis will be performed. A one stage approach to analysis will be taken so that the individual participant data from all eligible studies are included in a single model. Logistic regression models will be used for the binary outcome (late stillbirth). A fixed study effect and a study site effect will be included in the model specification as strata. Univariable analysis will be performed to evaluate the association between sleep position and late stillbirth risk. The interaction between sleep position and factors indicating a vulnerable pregnancy will be assessed in bi-variable models. A multivariable model will be developed incorporating previously reported confounders and any significant interaction terms, once it has been established what cofounders can be controlled



for consistently across studies. Estimate of risk will be reported as odds ratio and 95% confidence intervals.

If an important confounder is not available for one or more studies, sensitivity analysis will be conducted, with and without these studies, to compare risk estimates. If there are any controls who reported their pregnancy going-to-sleep position after they have given birth, sensitivity analysis will be conducted without these controls. Where sufficient data exist, all analysis will be also conducted in term and preterm subgroups. For missing data in each individual study, no imputation will be carried out. Statistical analyses will be performed using SAS (SAS Institute Inc., Cary NC USA).

## ETHICS AND DISSEMINATION

The IPD meta-analysis has obtained central ethics approval from the New Zealand Health and Disability Ethics Committee, ref: NTX/06/05/054/AM06. The participating studies retain the right to withdraw their data from the analysis at any time.

Final IPD results will be presented to the nominated representative from each participating study prior to publication and public dissemination. Interpretation of the results will be discussed with the Cribss consumer representatives. Results of the study will be published in peer-reviewed journals and presented at national and international conferences. For the publications from the main questions, every Cribss member will participate in the manuscript preparation and editing. Authorship will be guided by the recommendations of the International Committee of Medical Journal Editors.

## CONCLUSION

Cribss is the first IPD meta-analysis to evaluate the current evidence of the relationship between maternal going-to-sleep position and late stillbirth. The study will allow assessment of important interactions that cannot be tested in standard, aggregate data meta-analysis.

1  
2  
3  
4  
5  
6  
7  
8  
9  
10  
11  
12  
13  
14  
15  
16  
17  
18  
19  
20  
21  
22  
23  
24  
25  
26  
27  
28  
29  
30  
31  
32  
33  
34  
35  
36  
37  
38  
39  
40  
41  
42  
43  
44  
45  
46  
47  
48  
49  
50  
51  
52  
53  
54  
55  
56  
57  
58  
59  
60

The overall goal of Cribss is to reduce late stillbirth by developing high quality data based evidence- to inform public health messages about optimal late pregnancy sleep practices. This IPD meta-analysis may identify sub-groups of women at greater risk (such as those with known SGA fetuses, who continue to smoke during pregnancy or are overweight) and thus develop evidence that can be used to tailor public health messages.

**AUTHORS' CONTRIBUTION:** ML, JMDT, RSC, AG, CRG, AEPH, TS, EAM, LMEM, LA conceptualised the study. ML, JMDT, RSC, AG, CRG, AEPH, TS, VC, VB, EAM, LMEM, LA have participated in study design and funding application. ML drafted the manuscript. RSC drafted appendix1. LA, JMDT, RSC, AG, CRG, AEPH, TS, EAM, LMEM, critically revised the manuscript. ML, JMDT, RSC, AG, CRG, AEPH, TS, VC, VB, EAM, LMEM, LA have read and approved submission of the final manuscript. LMEM is the guarantor of the review.

**FUNDING STATEMENT:** This work was supported by 2016 Trans-Tasman Research Funding Grant, by Cure Kids and Red Nose, Australia (Grant 6601). Funder has no role in developing the protocol.

**COMPETING INTERESTS STATEMENT:** The authors declare that they have no competing interests.

**REFERENCES:**

1.Lawn JE, Blencowe H, Waiswa P, Amouzou A, Mathers C, Hogan D, et al. Stillbirths: rates, risk factors, and acceleration towards 2030. Lancet. 2016 Feb 06;387(10018):587-603.

2. Flenady V, Wojcieszek AM, Middleton P, Ellwood D, Erwich JJ, Coory M, et al. Stillbirths: recall to action in high-income countries. Lancet. 2016 Feb 13;387(10019):691-702.

3. Manktelow BN SL, Seaton SE, Hyman-Taylor P, Kurinczuk JJ, Field DJ, Smith PW, Draper ES, on behalf of the MBRRACE-UK Collaboration. MBRRACE-UK Perinatal Mortality Surveillance Report, UK Perinatal Deaths for Births from January to December 2014. .

- 1  
2  
3 368 Leicester: The Infant Mortality and Morbidity Studies, Department of Health Sciences,  
4  
5 369 University of Leicester, 2016. Report No.  
6  
7 370 4. Stillbirth Collaborative Research Network Writing G. Association between stillbirth and risk  
8  
9 371 factors known at pregnancy confirmation. *Jama*. 2011 Dec 14;306(22):2469-79.  
10  
11 372 5. Smith GC. Screening and prevention of stillbirth. *Best practice & research Clinical*  
12  
13 373 *obstetrics & gynaecology*. 2017 Jan;38:71-82.  
14  
15 374 6. Stacey T, Thompson JM, Mitchell EA, Ekeroma AJ, Zuccollo JM, McCowan LM.  
16  
17 375 Association between maternal sleep practices and risk of late stillbirth: a case-control study.  
18  
19 376 *Bmj*. 2011;342:d3403.  
20  
21 377 7. Gordon A, Raynes-Greenow C, Bond D, Morris J, Rawlinson W, Jeffery H. Sleep position,  
22  
23 378 fetal growth restriction, and late-pregnancy stillbirth: the Sydney stillbirth study. *Obstetrics*  
24  
25 379 *and gynecology*. 2015 Feb;125(2):347-55.  
26  
27 380 8. Owusu JT, Anderson FJ, Coleman J, Oppong S, Seffah JD, Aikins A, et al. Association of  
28  
29 381 maternal sleep practices with pre-eclampsia, low birth weight, and stillbirth among Ghanaian  
30  
31 382 women. *International journal of gynaecology and obstetrics: the official organ of the*  
32  
33 383 *International Federation of Gynaecology and Obstetrics*. 2013 Jun;121(3):261-5.  
34  
35 384 9. McCowan LME, Thompson JMD, Cronin RS, Li M, Stacey T, Stone PR, et al. Going to  
36  
37 385 sleep in the supine position is a modifiable risk factor for late pregnancy stillbirth; Findings  
38  
39 386 from the New Zealand multicentre stillbirth case-control study. *PloS one*.  
40  
41 387 2017;12(6):e0179396.  
42  
43 388 10. Jeffreys RM, Stepanchak W, Lopez B, Hardis J, Clapp JF, 3rd. Uterine blood flow during  
44  
45 389 supine rest and exercise after 28 weeks of gestation. *BJOG : an international journal of*  
46  
47 390 *obstetrics and gynaecology*. 2006 Nov;113(11):1239-47.  
48  
49 391 11. Khatib N, Weiner Z, Beloosesky R, Vitner D, Thaler I. The effect of maternal supine  
50  
51 392 position on umbilical and cerebral blood flow indices. *European journal of obstetrics,*  
52  
53 393 *gynecology, and reproductive biology*. 2014 Apr;175:112-4.  
54  
55  
56  
57  
58  
59  
60

1  
2  
3  
4  
5  
6  
7  
8  
9  
10  
11  
12  
13  
14  
15  
16  
17  
18  
19  
20  
21  
22  
23  
24  
25  
26  
27  
28  
29  
30  
31  
32  
33  
34  
35  
36  
37  
38  
39  
40  
41  
42  
43  
44  
45  
46  
47  
48  
49  
50  
51  
52  
53  
54  
55  
56  
57  
58  
59  
60

12. Stone PR, Burgess W, McIntyre JP, Gunn AJ, Lear CA, Bennet L, et al. Effect of maternal position on fetal behavioural state and heart rate variability in healthy late gestation pregnancy. *The Journal of physiology*. 2017 Feb 15;595(4):1213-21.

13. Milsom I, Forssman L. Factors influencing aortocaval compression in late pregnancy. *American journal of obstetrics and gynecology*. 1984 Mar 15;148(6):764-71.

14. Leppanen T, Toyraas J, Muraja-Murro A, Kupari S, Tiihonen P, Mervaala E, et al. Length of Individual Apnea Events Is Increased by Supine Position and Modulated by Severity of Obstructive Sleep Apnea. *Sleep disorders*. 2016;2016:9645347.

15. Fung AM, Wilson DL, Lappas M, Howard M, Barnes M, O'Donoghue F, et al. Effects of maternal obstructive sleep apnoea on fetal growth: a prospective cohort study. *PloS one*. 2013;8(7):e68057.

16. Franklin KA, Holmgren PA, Jonsson F, Poromaa N, Stenlund H, Svanborg E. Snoring, pregnancy-induced hypertension, and growth retardation of the fetus. *Chest*. 2000 Jan;117(1):137-41.

17. Flenady V, Koopmans L, Middleton P, Froen JF, Smith GC, Gibbons K, et al. Major risk factors for stillbirth in high-income countries: a systematic review and meta-analysis. *Lancet*. 2011 Apr 16;377(9774):1331-40.

18. Warland J, Mitchell EA. A triple risk model for unexplained late stillbirth. *BMC pregnancy and childbirth*. 2014 Apr 14;14:142.

19. Stewart LA, Clarke M, Rovers M, Riley RD, Simmonds M, Stewart G, et al. Preferred Reporting Items for Systematic Review and Meta-Analyses of individual participant data: the PRISMA-IPD Statement. *Jama*. 2015 Apr 28;313(16):1657-65.

20. Riley RD, Lambert PC, Abo-Zaid G. Meta-analysis of individual participant data: rationale, conduct, and reporting. *Bmj*. 2010 Feb 05;340:c221.

21. Debray TP, Riley RD, Rovers MM, Reitsma JB, Moons KG, Cochrane IPDM-aMg. Individual participant data (IPD) meta-analyses of diagnostic and prognostic modeling studies: guidance on their use. *PLoS medicine*. 2015 Oct;12(10):e1001886.

- 1  
2  
3 421 22. Ahmed I, Debray TP, Moons KG, Riley RD. Developing and validating risk prediction  
4 422 models in an individual participant data meta-analysis. BMC medical research methodology.  
5 423 2014 Jan 08;14:3.  
6  
7  
8  
9 424 23. Tudur Smith C, Hopkins C, Sydes MR, Woolfall K, Clarke M, Murray G, et al. How should  
10 425 individual participant data (IPD) from publicly funded clinical trials be shared? BMC medicine.  
11 426 2015 Dec 17;13:298.  
12  
13 427 24. WHO. Maternal, newborn, child and adolescent health: Data, statistics and epidemiology:  
14  
15 428 WHO; [cited 2016 21 November 2016]. Available from:  
16 429 [http://www.who.int/maternal\\_child\\_adolescent/epidemiology/stillbirth/en/](http://www.who.int/maternal_child_adolescent/epidemiology/stillbirth/en/).  
17  
18  
19  
20 430 25. Morgan R. The ROBINS-E tool (Risk Of Bias In Non-randomized Studies - of Exposures):  
21 431 University of Bristol; 2017 [cited 2017 20th October ]. Available from:  
22 432 <http://www.bristol.ac.uk/population-health-sciences/centres/cresyda/barr/riskofbias/robins-e/>.  
23  
24 433  
25  
26 434  
27  
28  
29  
30  
31  
32  
33  
34  
35  
36  
37  
38  
39  
40  
41  
42  
43  
44  
45  
46  
47  
48  
49  
50  
51  
52  
53  
54  
55  
56  
57  
58  
59  
60

1  
2  
3  
4  
5  
6  
7  
8  
9  
10  
11  
12  
13  
14  
15  
16  
17  
18  
19  
20  
21  
22  
23  
24  
25  
26  
27  
28  
29  
30  
31  
32  
33  
34  
35  
36  
37  
38  
39  
40  
41  
42  
43  
44  
45  
46  
47  
48  
49  
50  
51  
52  
53  
54  
55  
56  
57  
58  
59  
60

**Appendix 1:**  
**Search strategy for the Collaborative IPD of Sleep and Stillbirth (Cribss) study**

**Databases or search engines that will be used**

A search of the databases: MEDLINE, EMBASE, LILACS, Web of Science, OpenGrey, and Google Scholar, will be conducted, for the purpose of locating published research about an association between maternal sleep position and late pregnancy stillbirth. We will also access WHO International Clinical Trials Registry Platform to identify any ongoing and registered trials. Proceedings from International Stillbirth Alliance (ISA) annual conferences and The International Society for the Study and Prevention of Perinatal and Infant Death (ISPID) international conferences will be manually searched. Published perinatal conference abstracts will be identified through the above database searches. Experts in the field and the collaborative group will be asked for their knowledge of any unpublished studies.

**Limits applied**

To increase the likelihood of identifying all relevant studies, the reference lists of all retrieved articles will be hand searched. No language restriction will be applied.

**List the search terms used**

Three search terms will be used to search the databases with the article title, abstracts and body all searched. The search terms are:

- stillbirth
- fetal death
- sleep

and synonyms. The search terms will be tested to check that they effectively located the types of articles that are consistent with the inclusion criteria prior to conducting the search in all engines.

## Document the search process

The following search was conducted sequentially using the search terms in MEDLINE on 20<sup>th</sup> November 2016.

| Search engine  |    | Search terms                                                                                                                            | # Retrieved: |
|----------------|----|-----------------------------------------------------------------------------------------------------------------------------------------|--------------|
| <b>MEDLINE</b> |    |                                                                                                                                         |              |
| MEDLINE        | 1  | Stillbirth/                                                                                                                             | 3851         |
| MEDLINE        | 2  | (stillbirth* or still-birth* or stillborn* or still-born*).ti,ab,kf.                                                                    | 13691        |
| MEDLINE        | 3  | Fetal Death/                                                                                                                            | 24585        |
| MEDLINE        | 4  | ((fetal or foetal or fetus or foetus) adj death*).ti,ab,kf.                                                                             | 8769         |
| MEDLINE        | 5  | ((fetal or foetal or fetus or foetus) adj3 (loss or losses)).ti,ab,kf.                                                                  | 4804         |
| MEDLINE        | 6  | Perinatal Death/                                                                                                                        | 860          |
| MEDLINE        | 7  | ((perinatal or peri-natal) adj death*).ti,ab,kf.                                                                                        | 4007         |
| MEDLINE        | 8  | ((prenatal or pre-natal or intrauterine or intra-uterine or antepartum or ante-partum or antenatal or ante-natal) adj death*).ti,ab,kf. | 2026         |
| MEDLINE        | 9  | or/1-8                                                                                                                                  | 46353        |
| MEDLINE        | 10 | Sleep/                                                                                                                                  | 46957        |
| MEDLINE        | 11 | ((sleep or sleeping) adj (position* or practice* or posture*).ti,ab,kf.                                                                 | 1354         |
| MEDLINE        | 12 | maternal sleep*.ti,ab,kf.                                                                                                               | 139          |
| MEDLINE        | 13 | or/10-12                                                                                                                                | 47711        |
| MEDLINE        | 14 | 9 and 13                                                                                                                                | 23           |

1  
2  
3  
4  
5  
6  
7  
8  
9  
10  
11  
12  
13  
14  
15  
16  
17  
18  
19  
20  
21  
22  
23  
24  
25  
26  
27  
28  
29  
30  
31  
32  
33  
34  
35  
36  
37  
38  
39  
40  
41  
42  
43  
44  
45  
46  
47  
48  
49

**PRISMA-P (Preferred Reporting Items for Systematic review and Meta-Analysis Protocols) 2015 checklist: recommended items to address in a systematic review protocol\***

| Section and topic                 | Item No | Checklist item                                                                                                                                                                                                                | Check                  |
|-----------------------------------|---------|-------------------------------------------------------------------------------------------------------------------------------------------------------------------------------------------------------------------------------|------------------------|
| <b>ADMINISTRATIVE INFORMATION</b> |         |                                                                                                                                                                                                                               |                        |
| Title:                            |         |                                                                                                                                                                                                                               |                        |
| Identification                    | 1a      | Identify the report as a protocol of a systematic review                                                                                                                                                                      | Yes, P1, line 2        |
| Update                            | 1b      | If the protocol is for an update of a previous systematic review, identify as such                                                                                                                                            | na                     |
| Registration                      | 2       | If registered, provide the name of the registry (such as PROSPERO) and registration number                                                                                                                                    | Yes, P3, line 60       |
| Authors:                          |         |                                                                                                                                                                                                                               |                        |
| Contact                           | 3a      | Provide name, institutional affiliation, e-mail address of all protocol authors; provide physical mailing address of corresponding author                                                                                     | Yes, P2, line 4-36     |
| Contributions                     | 3b      | Describe contributions of protocol authors and identify the guarantor of the review                                                                                                                                           | Yes, P17, line 346-350 |
| Amendments                        | 4       | If the protocol represents an amendment of a previously completed or published protocol, identify as such and list changes; otherwise, state plan for documenting important protocol amendments                               | na                     |
| Support:                          |         |                                                                                                                                                                                                                               |                        |
| Sources                           | 5a      | Indicate sources of financial or other support for the review                                                                                                                                                                 | Yes, P17, line 353     |
| Sponsor                           | 5b      | Provide name for the review funder and/or sponsor                                                                                                                                                                             | Yes, P17, line 353     |
| Role of sponsor or funder         | 5c      | Describe roles of funder(s), sponsor(s), and/or institution(s), if any, in developing the protocol                                                                                                                            | Yes, P17, line 353     |
| <b>INTRODUCTION</b>               |         |                                                                                                                                                                                                                               |                        |
| Rationale                         | 6       | Describe the rationale for the review in the context of what is already known                                                                                                                                                 | Yes, P5, line 80-166   |
| Objectives                        | 7       | Provide an explicit statement of the question(s) the review will address with reference to participants, interventions, comparators, and outcomes (PICO)                                                                      | Yes, P8, line 163      |
| <b>METHODS</b>                    |         |                                                                                                                                                                                                                               |                        |
| Eligibility criteria              | 8       | Specify the study characteristics (such as PICO, study design, setting, time frame) and report characteristics (such as years considered, language, publication status) to be used as criteria for eligibility for the review | Yes, P9, line 195      |
| Information sources               | 9       | Describe all intended information sources (such as electronic databases, contact with study authors, trial registers or other grey literature sources) with planned dates of coverage                                         | Yes, P9-10, line 214   |



|                                    |     |                                                                                                                                                                                                                                                  |                                     |
|------------------------------------|-----|--------------------------------------------------------------------------------------------------------------------------------------------------------------------------------------------------------------------------------------------------|-------------------------------------|
| Search strategy                    | 10  | Present draft of search strategy to be used for at least one electronic database, including planned limits, such that it could be repeated                                                                                                       | Yes, P9-10, line 214 and appendix 1 |
| Study records:                     |     |                                                                                                                                                                                                                                                  |                                     |
| Data management                    | 11a | Describe the mechanism(s) that will be used to manage records and data throughout the review                                                                                                                                                     | Yes, P11, line 247-277              |
| Selection process                  | 11b | State the process that will be used for selecting studies (such as two independent reviewers) through each phase of the review (that is, screening, eligibility and inclusion in meta-analysis)                                                  | Yes, P10, line 236                  |
| Data collection process            | 11c | Describe planned method of extracting data from reports (such as piloting forms, done independently, in duplicate), any processes for obtaining and confirming data from investigators                                                           | Yes, P11, line 247-277              |
| Data items                         | 12  | List and define all variables for which data will be sought (such as PICO items, funding sources), any pre-planned data assumptions and simplifications                                                                                          | Yes, line 279-283 (table 1)         |
| Outcomes and prioritization        | 13  | List and define all outcomes for which data will be sought, including prioritization of main and additional outcomes, with rationale                                                                                                             | Yes, P14-15, line 284               |
| Risk of bias in individual studies | 14  | Describe anticipated methods for assessing risk of bias of individual studies, including whether this will be done at the outcome or study level, or both; state how this information will be used in data synthesis                             | Yes, P15, line 290                  |
| Data synthesis                     | 15a | Describe criteria under which study data will be quantitatively synthesised                                                                                                                                                                      | Yes, P15, line 296                  |
|                                    | 15b | If data are appropriate for quantitative synthesis, describe planned summary measures, methods of handling data and methods of combining data from studies, including any planned exploration of consistency (such as $I^2$ , Kendall's $\tau$ ) | Yes, P15, line 296                  |
|                                    | 15c | Describe any proposed additional analyses (such as sensitivity or subgroup analyses, meta-regression)                                                                                                                                            | Yes, P16, line 315                  |
|                                    | 15d | If quantitative synthesis is not appropriate, describe the type of summary planned                                                                                                                                                               | na                                  |
| Meta-bias(es)                      | 16  | Specify any planned assessment of meta-bias(es) (such as publication bias across studies, selective reporting within studies)                                                                                                                    | Yes, P16, line 315                  |
| Confidence in cumulative evidence  | 17  | Describe how the strength of the body of evidence will be assessed (such as GRADE)                                                                                                                                                               | na                                  |

**\* It is strongly recommended that this checklist be read in conjunction with the PRISMA-P Explanation and Elaboration (cite when available) for important clarification on the items. Amendments to a review protocol should be tracked and dated. The copyright for PRISMA-P (including checklist) is held by the PRISMA-P Group and is distributed under a Creative Commons Attribution Licence 4.0.**

*From: Shamseer L, Moher D, Clarke M, Ghersi D, Liberati A, Petticrew M, Shekelle P, Stewart L, PRISMA-P Group. Preferred reporting items for systematic review and meta-analysis protocols (PRISMA-P) 2015: elaboration and explanation. BMJ. 2015 Jan 2;349(jan02 1):g7647.*
